# Supplementary figures and images for: Refining urine collection in mice: Development of an innovative urine collection device
Source: PubMed Central journal article supplement — Lab Anim. 2024 Aug 19;58(6):612–5. doi: 10.1177/00236772231219828 (PMC11633060; doi:10.1177/00236772231219828), 2024-08-19

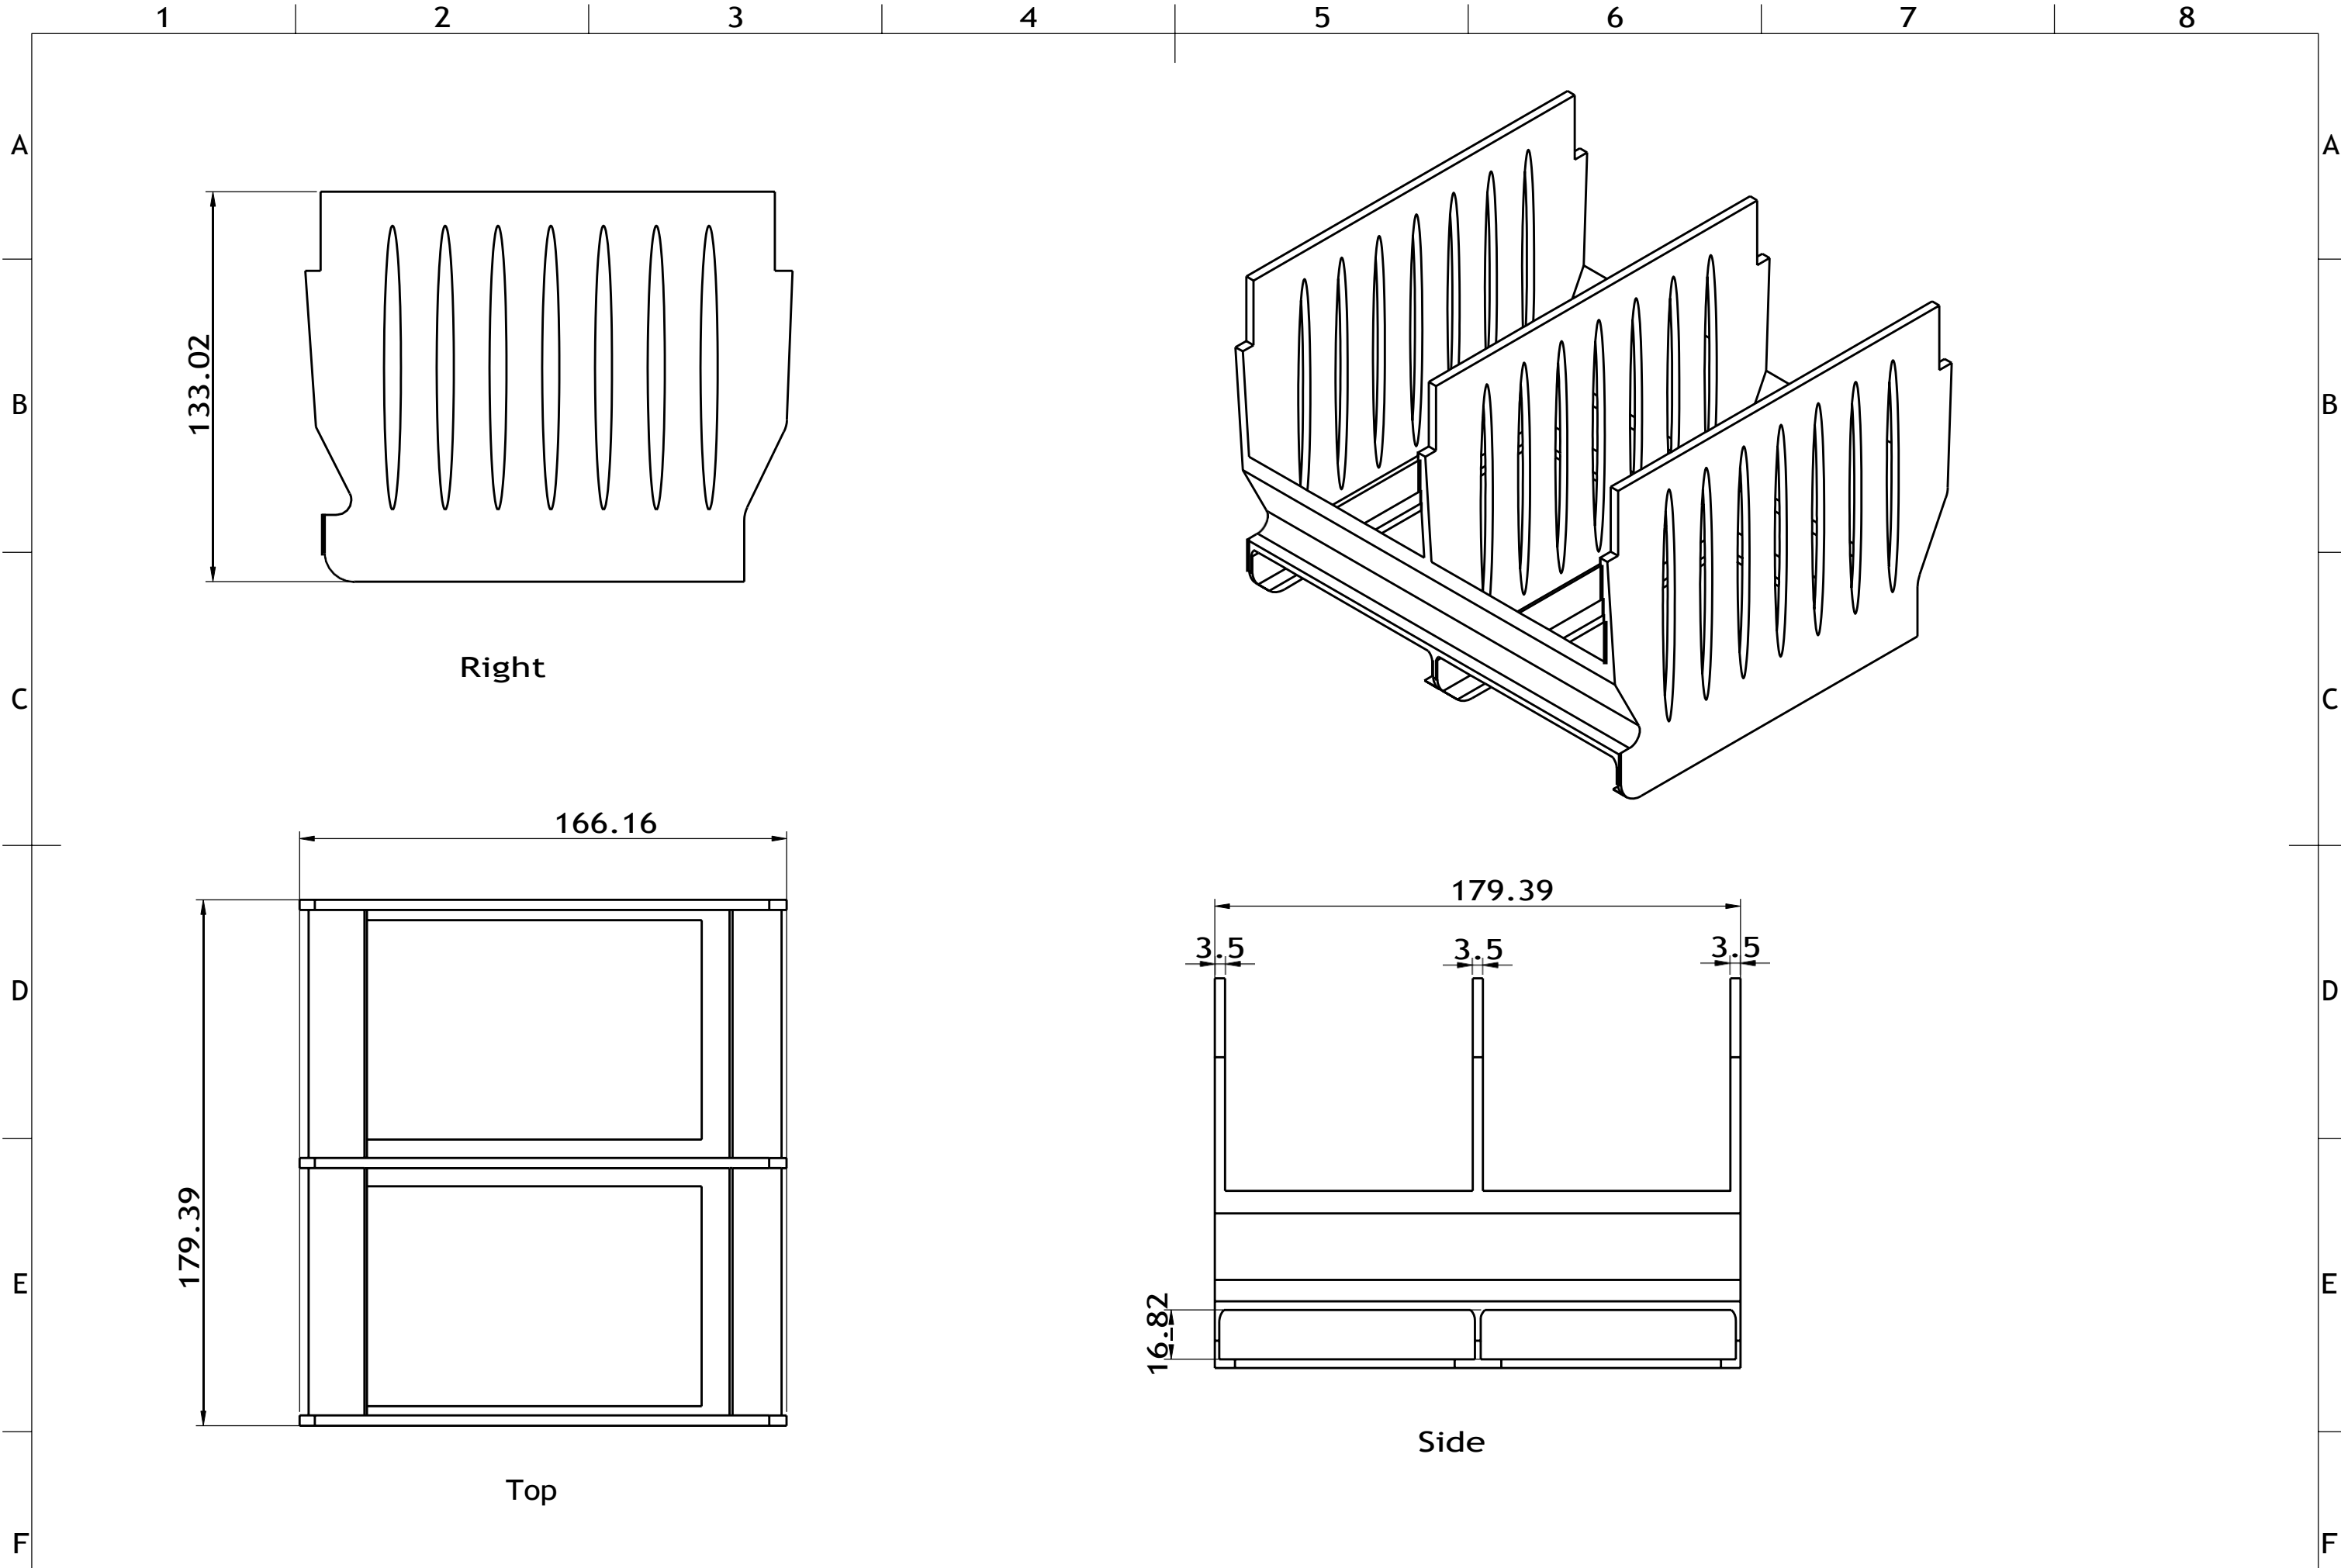

TITRE  
For Allentown© cages

UNITÉS  
mm

ANG. PROJ.  
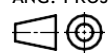

TAILLE  
A3

ÉCHELLE  
1:2

DERNIÈRE MISE À JOUR  
06/30/23

1 2 3 4 5 6 7 8

Supplement: sj-pdf-2-lan-10.1177_00236772231219828.pdf [file sj-pdf-2-lan-10.1177_00236772231219828.pdf]

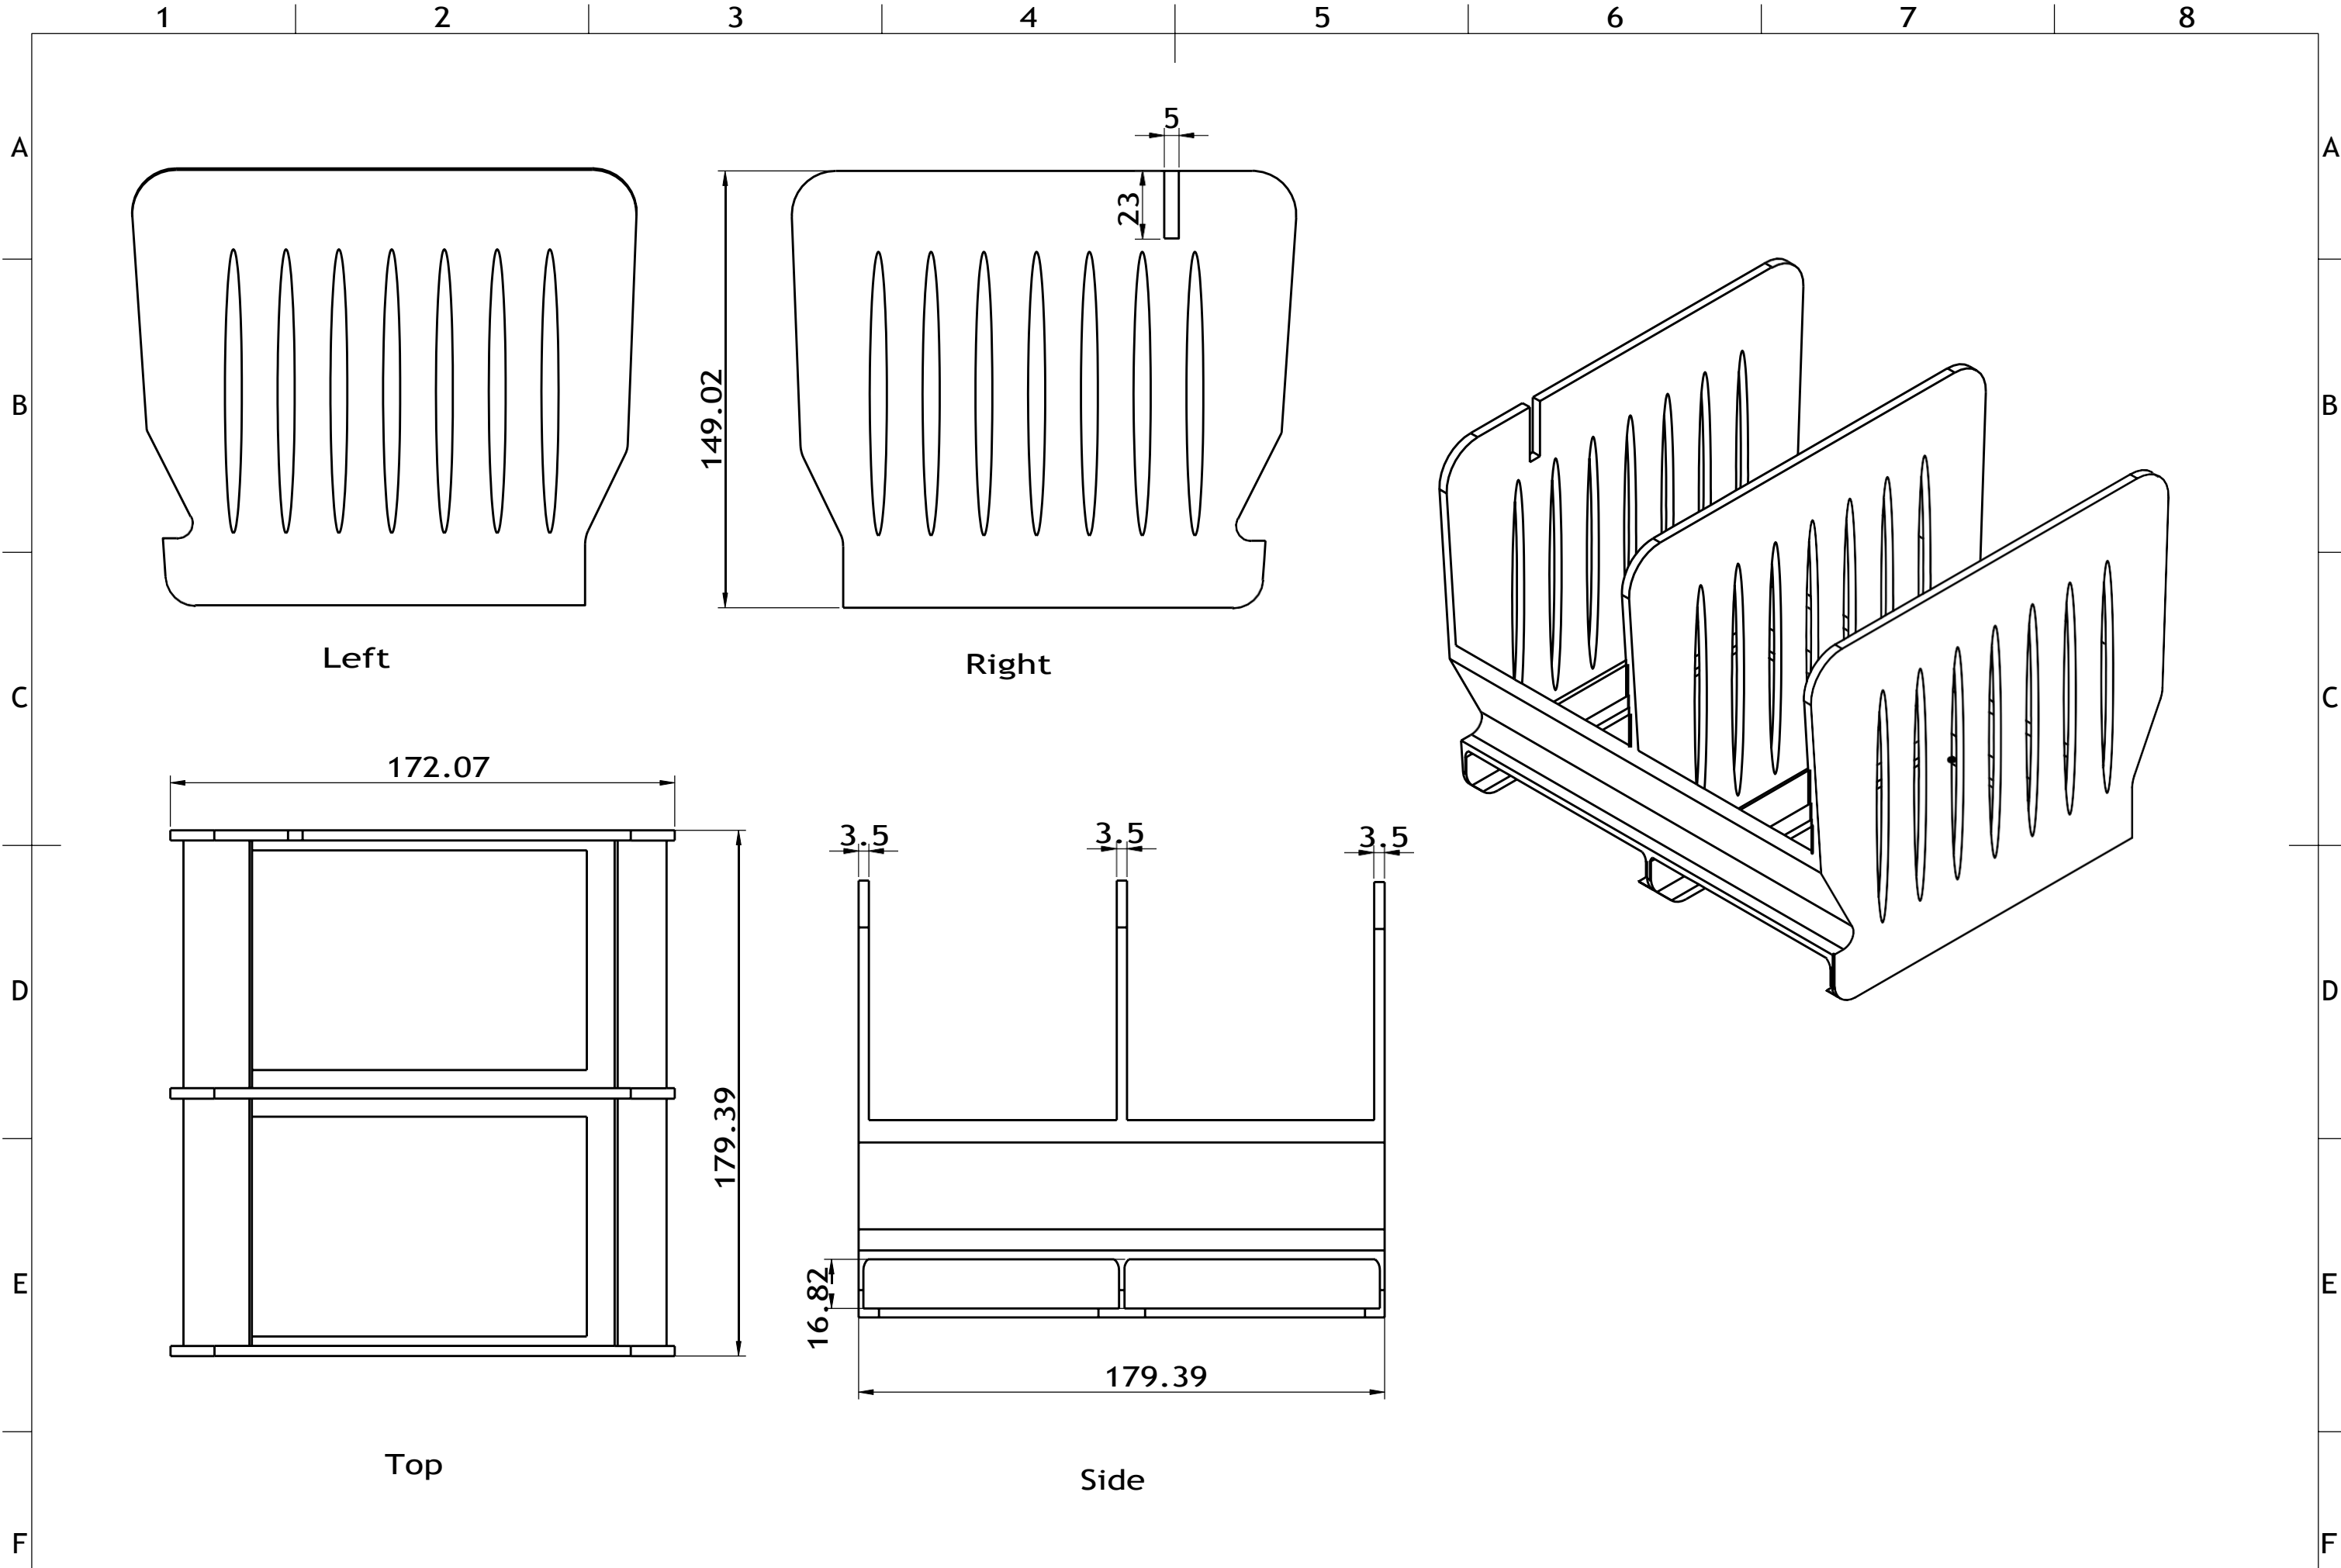

TITRE  
For Techniplast© cages

UNITÉS  
mm

ANG. PROJ.  


TAILLE  
A3

ÉCHELLE  
1:2

DERNIÈRE MISE À JOUR  
06/30/23

1 2 3 4 5 6 7 8

Supplement: sj-pdf-6-lan-10.1177_00236772231219828.pdf [file sj-pdf-6-lan-10.1177_00236772231219828.pdf]
